# Supplementary material for: Lipid Profiles of Human Serum Fractions Enhanced with CD9 Antibody-Immobilized Magnetic Beads
Source: Metabolites. 2022 Mar 5;12(3):230. doi: 10.3390/metabo12030230 (PMC8956076; doi:10.3390/metabo12030230)
Supplement: Supplementary file 1 [file metabolites-12-00230-s001.zip]

Archive with 4 entries (4 files):
- Supplementary Figure S1 all lipid profile.pdf
- Supplementary Figure S2 TG profile.pdf
- Supplementary Figure S3 PCprofile.pdf
- Supplementary Figure S4 LPCs.pdf
